# Supplementary material
Source: PubMed Central journal article supplement (PMC2972328)

**Appendix 1:** Fundus of the left eye of a patient with the wet form of age-related macular degeneration. In addition to drusen (D), subretinal hemorrhage (SRH) and associated subretinal fluid (SRF) are visible.

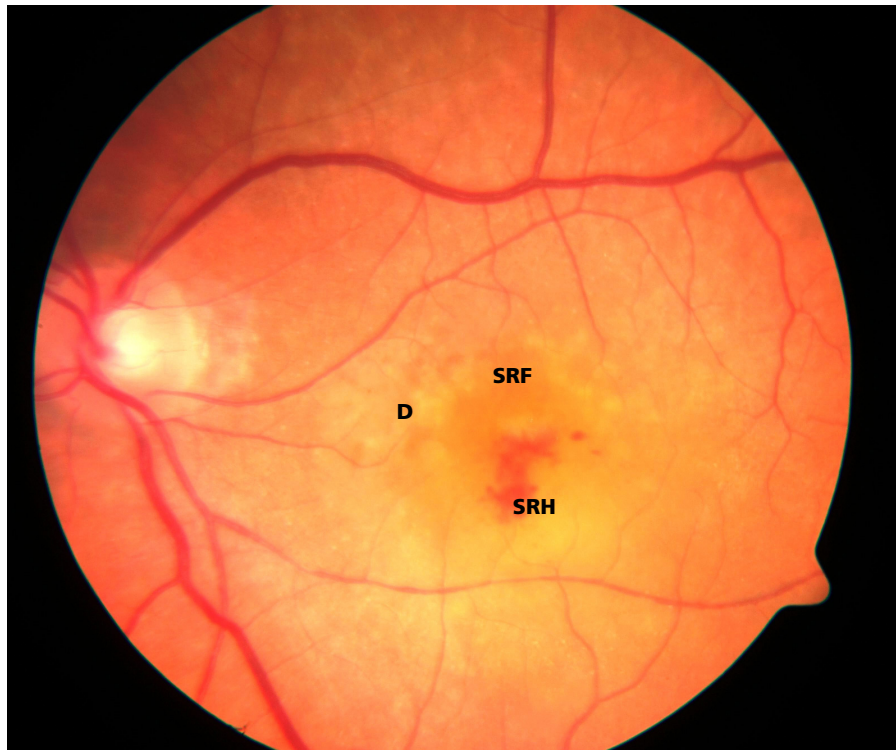

Supplement: 090378_1.pdf [file 090378_1.pdf]
