# Supplementary material
Source: PubMed Central journal article supplement (PMC2972328)
Supplement: 090378_2.pdf [file 090378_2.pdf]

**Appendix 2:** References for the article "Five things to know about age-related macular degeneration"

**References**

1. Clemons TE, Milton RC, Klein R, et al. Risk factors for the incidence of advanced age-related macular degeneration in the Age-Related Eye Disease Study (AREDS): AREDS report no. 19. *Ophthalmology* 2005;112:533-9.
2. Moshfeghi DM, Blumenkranz MS. Role of genetic factors and inflammation in age-related macular degeneration. *Retina* 2007;27:269-75.
3. Klein R, Klein BE, Lee KE, et al. Changes in visual acuity in a population over a 15-year period: the Beaver Dam Eye Study. *Am J Ophthalmol* 2006;142:539-49.
4. *American Academy of Ophthalmology preferred practice patterns*. San Francisco (CA): American Academy of Ophthalmology; 2008. Available: [http://one.aaof.org/CE/PracticeGuidelines/PPP\\_Content.aspx?cid=f413917a-8623-4746-b441-f817265eafb4](http://one.aaof.org/CE/PracticeGuidelines/PPP_Content.aspx?cid=f413917a-8623-4746-b441-f817265eafb4) (accessed 2010 Jan. 15).
5. Age-Related Eye Disease Study Research Group. A randomized, placebo-controlled, clinical trial of high-dose supplementation with vitamins C and E, beta carotene, and zinc for age-related macular degeneration and vision loss: AREDS report no. 8. *Arch Ophthalmol* 2001;119:1417-36.
6. Tan JS, Mitchell P, Kifley A, et al. Smoking and the long-term incidence of age-related macular degeneration: the Blue Mountains Eye Study. *Arch Ophthalmol* 2007;125:1089-95.
